# Supplementary material for: Phylogeography of plastid DNA sequences suggests post-glacial southward demographic expansion and the existence of several glacial refugia for Araucaria angustifolia
Source: PubMed Central journal article supplement (PMC6391371; doi:10.1038/s41598-019-39308-w), 2019-02-26
Supplement: 41598_2019_39308_MOESM1_ESM.pdf [file 41598_2019_39308_MOESM1_ESM.pdf]

# Phylogeography of plastid DNA sequences suggests post-glacial southward demographic expansion and the existence of several glacial refugia for *Araucaria angustifolia*

Valdir Marcos Stefenon, Gustavo Klabunde, Rafael Plá Matielo Lemos, Marcelo Rogalski, Rubens Onofre Nodari

## Supplementary files

**Table 1:** Haplotype distribution in 39 populations of *A. angustifolia* sampled across the entire range of the species distribution.

**File 2.1:** Summary of the SAMOVA analysis with  $K$  set from 2 to 15.

**File 2.2:** Genetic structure suggested by the SAMOVA analysis for  $K = 3$ .

**Table 3.1:** Input file for the program MaxEnt, including the geographic coordinates of all populations sampled for this study.

**Table 3.2:** Percent contribution of the bioclimatic environmental variables for the predictive distribution of *A. angustifolia* in the maximum entropy analysis.

**Table 4:** Traces of the Bayesian Skyline analysis for each genetic group.

**Supplementary Table 1:** Haplotype distribution in 39 populations of *A. angustifolia* sampled across the entire range of the species distribution. The frequency of the haplotypes for each geographic-genetic group (N = Northern; C = Central; S = Southern) region is given. Haplotypes exclusive from the Northern group are in red, haplotypes exclusive from the Central group are in blue and haplotypes exclusive from the Southern group are in yellow. Haplotypes shared between Northern and Southern populations are in green.

| Region | Haplotype |     |     |     |     |     |     |     |     |      |      |      |      |      |     |     |     |     |     |     |
|--------|-----------|-----|-----|-----|-----|-----|-----|-----|-----|------|------|------|------|------|-----|-----|-----|-----|-----|-----|
|        | H1        | H2  | H3  | H10 | H17 | H18 | H19 | H20 | H16 | H15  | H4   | H9   | H11  | H12  | H5  | H6  | H7  | H8  | H13 | H14 |
| N      | 1.0       | 1.0 | 1.0 | 1.0 | 1.0 | 1.0 | 1.0 | 1.0 | 0.0 | 0.0  | 0.0  | 0.0  | 0.0  | 0.0  | 0.0 | 0.0 | 0.0 | 0.0 | 0.0 | 0.0 |
| C      | 0.0       | 0.0 | 0.0 | 0.0 | 0.0 | 0.0 | 0.0 | 0.0 | 1.0 | 0.92 | 0.06 | 0.96 | 0.03 | 0.89 | 0.0 | 0.0 | 0.0 | 0.0 | 0.0 | 0.0 |
| S      | 0.0       | 0.0 | 0.0 | 0.0 | 0.0 | 0.0 | 0.0 | 0.0 | 0.0 | 0.08 | 0.94 | 0.04 | 0.97 | 0.11 | 1.0 | 1.0 | 1.0 | 1.0 | 1.0 | 1.0 |
| Pop    |           |     |     |     |     |     |     |     |     |      |      |      |      |      |     |     |     |     |     |     |
| BAR    | 8         | 6   | 1   |     |     |     |     |     |     |      |      |      |      |      |     |     |     |     |     |     |
| CDJ    | 2         |     | 7   | 6   |     |     |     |     |     |      |      |      |      |      |     |     |     |     |     |     |
| IBI    |           |     |     |     | 9   | 5   |     |     |     |      |      |      |      |      |     |     |     |     |     |     |
| MVE    |           |     |     |     | 9   | 6   |     |     |     |      |      |      |      |      |     |     |     |     |     |     |
| PES    |           |     |     |     | 13  | 2   | 1   |     |     |      |      |      |      |      |     |     |     |     |     |     |
| SAB    |           |     |     |     | 10  |     |     | 2   |     |      |      |      |      |      |     |     |     |     |     |     |
| VMA    |           |     |     |     | 12  | 2   |     |     |     |      |      |      |      |      |     |     |     |     |     |     |
| MRV    |           |     |     |     |     |     |     |     |     | 8    | 4    | 3    |      |      |     |     |     |     |     |     |
| CWB    |           |     |     |     |     |     |     |     |     | 7    |      | 7    |      |      |     |     |     |     |     | 1   |
| FXN    |           |     |     |     |     |     |     |     |     | 3    |      | 6    |      |      |     |     |     |     |     | 6   |
| IMB    |           |     |     |     |     |     |     |     |     |      |      | 5    |      |      |     |     |     |     |     | 10  |
| IRT    |           |     |     |     |     |     |     |     |     | 1    |      | 13   |      |      |     |     |     |     |     | 1   |
| LJS    |           |     |     |     |     |     |     |     | 3   | 7    |      |      |      |      |     |     |     |     |     | 5   |
| MRN    |           |     |     |     |     |     |     |     | 2   |      |      | 7    |      |      |     |     |     |     |     | 6   |
| PGR    |           |     |     |     |     |     |     |     | 2   |      |      | 11   |      |      |     |     |     |     |     | 2   |
| TRV    |           |     |     |     |     |     |     |     | 1   |      |      |      |      |      |     |     |     |     |     | 14  |
| PLM    |           |     |     |     |     |     |     |     | 3   | 7    |      |      |      |      |     |     |     |     |     | 5   |
| CHP    |           |     |     |     |     |     |     |     |     |      | 7    |      |      |      |     |     |     |     |     | 8   |
| DSV    |           |     |     |     |     |     |     |     | 5   |      |      |      | 1    |      |     |     |     |     |     | 9   |
| PBC    |           |     |     |     |     |     |     |     |     | 3    | 8    |      |      |      |     |     |     |     |     | 4   |
| MIS    |           |     |     |     |     |     |     |     |     |      |      |      | 8    |      |     |     |     | 3   |     | 1   |
| PTS    |           |     |     |     |     |     |     |     |     |      | 7    |      | 7    |      |     |     |     |     |     | 1   |
| CCD    |           |     |     |     |     |     |     |     |     |      | 10   | 1    |      |      |     |     |     |     |     | 4   |
| VDR    |           |     |     |     |     |     |     |     |     |      | 7    | 1    |      |      |     |     |     |     |     | 7   |
| BJS    |           |     |     |     |     |     |     |     |     |      | 9    |      |      |      | 5   | 1   |     |     |     |     |
| BRT    |           |     |     |     |     |     |     |     |     |      | 11   |      |      |      |     |     |     | 4   |     |     |

|     |    |   |  |  |   |   |   |   |
|-----|----|---|--|--|---|---|---|---|
| CBS | 9  |   |  |  |   | 5 | 1 |   |
| CDR | 9  | 6 |  |  |   |   |   |   |
| CNS | 6  |   |  |  |   |   | 8 | 1 |
| CPV | 5  | 1 |  |  | 7 |   |   | 1 |
| CTV | 9  |   |  |  |   | 6 |   |   |
| GMD | 10 |   |  |  | 4 |   |   | 1 |
| LGS | 7  | 6 |  |  |   | 2 |   |   |
| LVM | 11 | 1 |  |  |   | 3 |   |   |
| NPT | 10 |   |  |  | 3 |   |   | 2 |
| PFD | 12 | 2 |  |  |   |   |   | 1 |
| RQM | 13 | 2 |  |  |   |   |   |   |
| SJQ | 4  | 5 |  |  | 1 |   | 3 | 2 |
| URU | 14 |   |  |  |   |   | 1 |   |

**Supplementary File 2.1:** Summary of the SAMOVA analysis with  $K$  set from 2 to 15.

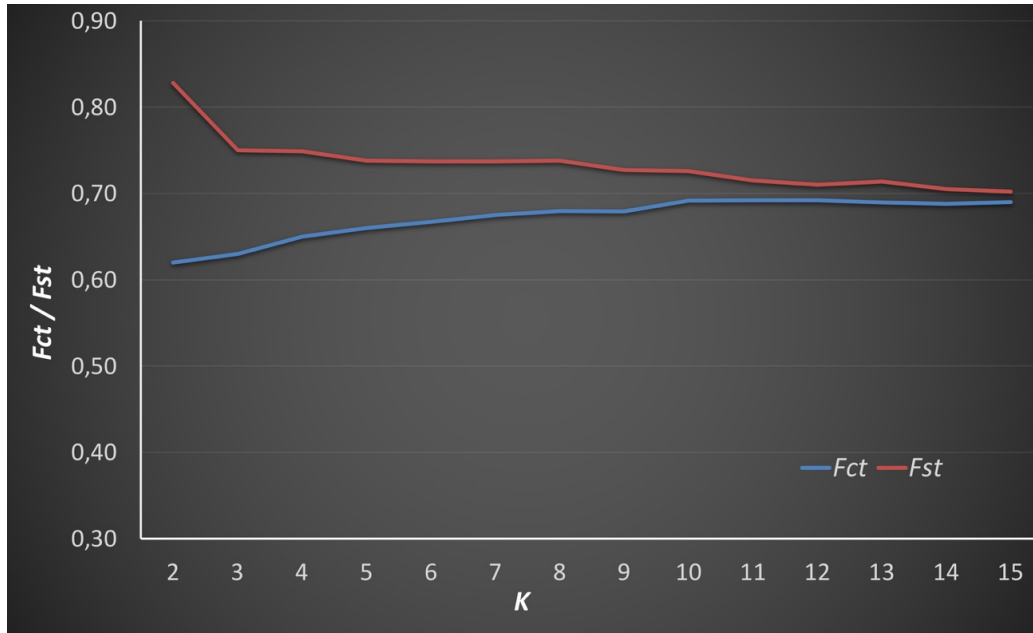

**Supplementary File 2.2:** Genetic structure suggested by the SAMOVA analysis for  $K = 3$ .

-----  
Genetic structure to test:  
-----

No. of Groups = 3

```
[[Structure]]
```

```
StructureName = "3 groups of populations"  
NbGroups = 3
```

```
#Group1
```

```
Group={  
"BAR"  
"CDJ"  
"MRV"  
"CWB"  
"FXN"  
"IMB"  
"IRT"  
"LJS"  
"MRN"  
"PGR"  
"TRV"  
"PLM"  
"CHP"  
"DSV"
```

```
}
```

```
#Group2
```

```
Group={  
  "IBI"  
  "MVE"  
  "PES"  
  "SBA"  
  "VMA"  
}
```

```
#Group3
```

```
Group={  
  "PBC"  
  "MIS"  
  "PTS"  
  "CCD"  
  "VDR"  
  "BJS"  
  "BRT"  
  "CBS"  
  "CDR"  
  "CNS"  
  "CPV"  
  "CTV"  
  "GMD"  
  "LGS"  
  "LVM"  
  "NPT"  
  "PFD"  
  "RQM"  
  "SJQ"  
  "URU"  
}
```

**Supplementary Table 3.1:** Input file for the program MaxEnt, including the geographic coordinates off all populations sampled for this study.

| species   | dd long  | dd lat   |
|-----------|----------|----------|
| Araucaria | -44.4335 | -22.0215 |
| Araucaria | -45.1325 | -21.1154 |
| Araucaria | -46.1637 | -22.4846 |
| Araucaria | -44.3607 | -22.1922 |
| Araucaria | -44.5432 | -21.5903 |
| Araucaria | -43.5432 | -21.4352 |
| Araucaria | -50.39   | -28.32   |
| Araucaria | -50.25   | -27.54   |
| Araucaria | -49.59   | -28.12   |
| Araucaria | -49.26   | -27.47   |
| Araucaria | -49.09   | -27.39   |
| Araucaria | -51.00   | -26.5    |
| Araucaria | -51.05   | -27.22   |
| Araucaria | -51.55   | -27.21   |
| Araucaria | -49.59   | -26.23   |
| Araucaria | -50.37   | -27.18   |
| Araucaria | -51.07   | -27.01   |
| Araucaria | -52.19   | -28.14   |
| Araucaria | -51.39   | -27.03   |
| Araucaria | -50.59   | -29.21   |
| Araucaria | -51.33   | -28.12   |
| Araucaria | -51.50   | -26.54   |
| Araucaria | -49.19   | -25.25   |
| Araucaria | -50.52   | -25.22   |
| Araucaria | -52.28   | -26.22   |
| Araucaria | -50.18   | -25.02   |
| Araucaria | -51.32   | -25.03   |
| Araucaria | -52.23   | -25.22   |
| Araucaria | -52.53   | -25.55   |
| Araucaria | -50.45   | -24.27   |
| Araucaria | -52.50   | -25.44   |
| Araucaria | -51.40   | -24.53   |
| Araucaria | -51.19   | -23.59   |
| Araucaria | -51.39   | -24.24   |
| Araucaria | -45.35   | -22.44   |
| Araucaria | -54.00   | -26.51   |
| Araucaria | -53.29   | -30.30   |
| Araucaria | -49.35   | -28.00   |
| Araucaria | -43.46   | -21.13   |
| Araucaria | -51.07   | -29.23   |

**Supplementary Table 3.2:** Percent contribution of the bioclimatic environmental variables for the predictive distribution of *A. angustifolia* in the maximum entropy analysis.

| BioClim Legend | Environmental Variables                                  | Percent of contribution |
|----------------|----------------------------------------------------------|-------------------------|
| BIO 17         | Precipitation of Driest Quarter                          | 27.4                    |
| BIO 18         | Precipitation of Warmest Quarter                         | 20.7                    |
| BIO 3          | Isothermality (BIO2/BIO7) × (100)                        | 20.5                    |
| BIO 4          | Temperature Seasonality (standard deviation × 100)       | 14.1                    |
| BIO 11         | Mean Temperature of Coldest Quarter                      | 8.1                     |
| BIO 14         | Precipitation of Driest Month                            | 4.6                     |
| BIO 10         | Mean Temperature of Warmest Quarter                      | 1.7                     |
| BIO 1          | Annual Mean Temperature                                  | 0.0                     |
| BIO 2          | Mean Diurnal Range [Mean of monthly (max temp-min temp)] | 0.0                     |
| BIO 5          | Max Temperature of Warmest Month                         | 0.0                     |
| BIO 6          | Min Temperature of Coldest Month                         | 0.0                     |
| BIO 7          | Temperature Annual Range (BIO5 – BIO6)                   | 0.0                     |
| BIO 8          | Mean Temperature of Wettest Quarter                      | 0.0                     |
| BIO 9          | Mean Temperature of Driest Quarter                       | 0.0                     |
| BIO 12         | Annual Precipitation                                     | 0.0                     |
| BIO 13         | Precipitation of Wettest Month                           | 0.0                     |
| BIO 15         | Precipitation Seasonality (coefficient of variation)     | 0.0                     |
| BIO 16         | Precipitation of Wettest Quarter                         | 0.0                     |
| BIO 19         | Precipitation of Coldest Quarter                         | 0.0                     |

**Supplementary Table 4:** Traces of the Bayesian Skyline analysis for each genetic group. ESS (effective sample size) is an estimate of how many effectively independent draws from the marginal posterior distribution the MCMC is equivalent to. ESS > 200 assures that the MCMC simulation provides a very good estimate of the posterior distribution.

| Statistic        | Northern genetic group |       | Central genetic group |      | Southern genetic group |      |
|------------------|------------------------|-------|-----------------------|------|------------------------|------|
|                  | Mean                   | ESS   | Mean                  | ESS  | Mean                   | ESS  |
| Posterior        | -2588.928              | 1341  | -1768.014             | 436  | -1823.179              | 542  |
| Likelihood       | -3340.138              | 2774  | -3319.100             | 1700 | -3369.527              | 1628 |
| Prior            | 751.210                | 1376  | 1551.086              | 439  | 1546.348               | 546  |
| treeLikelihood   | -3340.138              | 2774  | -3319.100             | 1700 | -3369.527              | 1628 |
| TreeHeight       | 5.603E-4               | 8962  | 4.127E-4              | 6225 | 4.791E-4               | 1924 |
| gammaShape       | 1.027                  | 3109  | 0.985                 | 2690 | 0.712                  | 2174 |
| BayesianSkyline  | 718.525                | 1376  | 1515.998              | 441  | 1513.925               | 542  |
| bPopSizes. 1     | 7.473E-4               | 1277  | 5.790E-4              | 329  | 7.694E-4               | 296  |
| bPopSizes. 2     | 4.582E-4               | 2029  | 2.806E-4              | 645  | 3.799E-4               | 891  |
| bPopSizes. 3     | 3.950E-4               | 3414  | 2.047E-4              | 1634 | 3.917E-4               | 1462 |
| bPopSizes. 4     | 3.680E-4               | 7829  | 1.996E-4              | 2585 | 4.705E-4               | 2124 |
| bPopSizes. 5     | 3.148E-4               | 6630  | 2.372E-4              | 4180 | 3.484E-4               | 1313 |
| bGroupSizes. 1   | 19.440                 | 8237  | 37.227                | 1610 | 43.134                 | 1502 |
| pGroupSizes. 2   | 19.848                 | 16038 | 38.651                | 2899 | 45.304                 | 2744 |
| pGroupSizes. 3   | 20.068                 | 18899 | 39.708                | 3360 | 45.557                 | 2279 |
| pGroupSizes. 4   | 20.181                 | 18163 | 40.607                | 2168 | 42.947                 | 2625 |
| pGroupSizes. 5   | 20.463                 | 11422 | 37.807                | 1785 | 35.059                 | 1688 |
| kappa            | 1.215                  | 3836  | 1.791                 | 3275 | 1.87                   | 5090 |
| freqParameter. 1 | 0.284                  | 4941  | 0.285                 | 5464 | 0.285                  | 4669 |
| freqParameter. 2 | 0.180                  | 5349  | 0.181                 | 5708 | 0.182                  | 5161 |
| freqParameter. 3 | 0.218                  | 5078  | 0.217                 | 5749 | 0.217                  | 4733 |
| freqParameter. 4 | 0.318                  | 4758  | 0.317                 | 5603 | 0.316                  | 4731 |
